# Supplementary material
Source: PubMed Central journal article supplement (PMC7747934)
Supplement: NIHMS1651461-supplement-Supp_PDF.pdf [file NIHMS1651461-supplement-Supp_PDF.pdf]

In the format provided by the authors and unedited.

# Structural and mechanistic insights into 5-lipoxygenase inhibition by natural products

Nathaniel C. Gilbert <sup>1,4</sup>, Jana Gerstmeier<sup>2,4</sup>, Erin E. Schexnaydre <sup>1</sup>, Friedemann Börner<sup>2</sup>, Ulrike Garscha <sup>2</sup>, David B. Neau<sup>3</sup>, Oliver Werz <sup>2</sup> ✉ and Marcia E. Newcomer <sup>1</sup> ✉

---

<sup>1</sup>Department of Biological Sciences, Louisiana State University, Baton Rouge, LA, USA. <sup>2</sup>Department of Pharmaceutical/Medicinal Chemistry, Institute of Pharmacy, Friedrich-Schiller-University, Jena, Germany. <sup>3</sup>Cornell University, Northeastern Collaborative Access Team, Argonne National Laboratory, Argonne, IL, USA. <sup>4</sup>These authors contributed equally: Nathaniel C. Gilbert, Jana Gerstmeier. ✉e-mail: [oliver.werz@uni-jena.de](mailto:oliver.werz@uni-jena.de); [newcomer@lsu.edu](mailto:newcomer@lsu.edu)

|                                                      | Stable-5-LOX with<br>NDGA (6N2W) | Stable-5-LOX with AKBA<br>(6NCF) |
|------------------------------------------------------|----------------------------------|----------------------------------|
| <b>Data collection</b>                               |                                  |                                  |
| Space group                                          | P 1 2 <sub>1</sub> 1             | P 1 2 <sub>1</sub> 1             |
| Cell dimensions                                      |                                  |                                  |
| <i>a</i> , <i>b</i> , <i>c</i> (Å)                   | 76.7, 204.4, 48.2                | 76.9, 203.7, 110.4               |
| $\alpha$ , $\beta$ , $\gamma$ (°)                    | 90, 99.9, 90                     | 90, 109.7, 90                    |
| Resolution (Å)                                       | 51.09- 2.71 (2.81 - 2.71)        | 101.9-3.0 (3.11-3.0)             |
| <i>R</i> <sub>sym</sub> or <i>R</i> <sub>merge</sub> | 0.25 (1.45)                      | 0.22 (0.85)                      |
| <i>I</i> / $\sigma$ <i>I</i>                         | 6.58 (0.86)                      | 6.01 (1.80)                      |
| Completeness (%)                                     | 98.58 (89.09)                    | 97.98 (98.27)                    |
| Redundancy                                           | 3.7 (3.4)                        | 3.8 (3.9)                        |
| <b>Refinement</b>                                    |                                  |                                  |
| Resolution (Å)                                       | 2.71 (2.74–2.71)                 | 30.4 - 3.00 (3.05-3.00)          |
| No. reflections                                      | 38857 (3389)                     | 62566 (6248)                     |
| <i>R</i> <sub>work</sub> / <i>R</i> <sub>free</sub>  | 0.213 / 0.263                    | 0.266 / 0.291                    |
| No. atoms                                            | 10035                            | 21902                            |
| Protein                                              | 9850                             | 21830                            |
| Ligand/ion                                           | 24                               | 41                               |
| Water                                                | 171                              | 31                               |
| <i>B</i> -factors                                    | 49.54                            | 33.66                            |
| Protein                                              | 49.57                            | 33.72                            |
| Ligand/ion                                           | 65.92                            | 17.49                            |
| Water                                                | 45.35                            | 10.03                            |
| R.m.s. deviations                                    |                                  |                                  |
| Bond lengths (Å)                                     | 0.007                            | 0.004                            |
| Bond angles (°)                                      | 0.82                             | 0.74                             |

**Supplementary Table 1. Data collections and refinement statistics.** Statistics for the highest resolution shell are shown in parentheses.

|            | pg/1x10 <sup>6</sup> cells | vehicle       | AKBA          | [%]  | NDGA          | [%]  |
|------------|----------------------------|---------------|---------------|------|---------------|------|
| 5-LOX      | LTB <sub>4</sub>           | 1600 ± 195    | 953 ± 267     | 60   | 1.6 ± 0.6     | 0.1  |
|            | t-LTB <sub>4</sub>         | 571 ± 130     | 262 ± 55      | 46   | 1.1 ± 0.6     | 0.2  |
|            | 5-HETE                     | 5040 ± 791    | 4140 ± 1597   | 82   | 298 ± 95      | 6    |
|            | 12-HETE                    | 60 ± 13       | 551 ± 142     | 918  | 76 ± 10       | 127  |
|            | 15-HETE                    | 414 ± 75      | 566 ± 283     | 137  | 530 ± 175     | 128  |
| 5-LOX/FLAP | LTB <sub>4</sub>           | 8608 ± 1465   | 1598 ± 472    | 19   | 51 ± 20       | 0.5  |
|            | t-LTB <sub>4</sub>         | 4931 ± 1175   | 427 ± 106     | 9    | 5 ± 1.2       | 0.1  |
|            | 5-HETE                     | 19,834 ± 4301 | 8453 ± 2548   | 43   | 228 ± 45      | 1    |
|            | 12-HETE                    | 105 ± 21      | 1188 ± 435    | 1131 | 50 ± 22       | 48   |
|            | 15-HETE                    | 296 ± 73      | 439 ± 100     | 148  | 325 ± 58      | 110  |
| 12-LOX     | LTB <sub>4</sub>           | 133 ± 13      | 103 ± 21      | 77   | 23 ± 7        | 17   |
|            | t-LTB <sub>4</sub>         | 51 ± 12       | 26 ± 3        | 51   | 14 ± 5        | 27   |
|            | 5-HETE                     | n.d.          | n.d.          | n.d. | n.d.          | n.d. |
|            | 12-HETE                    | 36,977 ± 2968 | 29,763 ± 2492 | 80   | 31,362 ± 5194 | 85   |
|            | 15-HETE                    | n.d.          | n.d.          | n.d. | n.d.          | n.d. |
| 15-LOX-1   | LTB <sub>4</sub>           | 5 ± 0.2       | 6 ± 1.3       | 120  | 0.2 ± 0.5     | 4    |
|            | t-LTB <sub>4</sub>         | 1.7 ± 1.0     | 1.9 ± 0.6     | 100  | 0.2 ± 0.6     | 0    |
|            | 5-HETE                     | 229 ± 49      | 244 ± 87      | 107  | 181 ± 50      | 79   |
|            | 12-HETE                    | 219 ± 113     | 265 ± 155     | 121  | 73 ± 39       | 33   |
|            | 15-HETE                    | 2360 ± 752    | 1956 ± 827    | 83   | 425 ± 96      | 18   |
| 15-LOX-2   | LTB <sub>4</sub>           | 6.4 ± 2.4     | 30 ± 5        | 460  | n.d.          | n.d. |
|            | t-LTB <sub>4</sub>         | 2.4 ± 0.9     | 8.5 ± 2.6     | 100  | n.d.          | n.d. |
|            | 5-HETE                     | 138 ± 46      | 230 ± 53      | 167  | 193 ± 49      | 140  |
|            | 12-HETE                    | 50 ± 23       | 59 ± 22       | 118  | 42 ± 13       | 84   |
|            | 15-HETE                    | 24,221 ± 9176 | 33,458 ± 9061 | 138  | 3966 ± 1193   | 16   |

**Supplementary Table 2. Modulation of the LM profile by AKBA and NDGA in stably transfected HEK293 cells.** Data are presented as absolute values in pg/10<sup>6</sup> cells (mean ± S.E.M., n = 3) and as percentage of control (100%, white) in a heat map.

|                        | AKBA | NDGA |
|------------------------|------|------|
| LTB <sub>4</sub>       | 31   | 17   |
| t-LTB <sub>4</sub>     | 59   | 76   |
| 20-OH-LTB <sub>4</sub> | 45   | 29   |
| 5-HETE                 | 48   | 54   |
| 12-HETE                | 209  | 22   |
| 15-HETE                | 161  | 29   |

**Supplementary Table 3. Effects of AKBA or NDGA on lipid mediator formation in human neutrophils activated with *E. coli*.** Percentage inhibition is shown in a heat map (100%, white) upon 10  $\mu$ M AKBA or 1  $\mu$ M NDGA. Data are means of n=3 independent experiments.

| 5-LOX              | 12-LOX | 15-LOX-1 | 15-LOX-2 |
|--------------------|--------|----------|----------|
| <b>H-Bond</b>      |        |          |          |
| R101               | R98    | R98      | Q108     |
| H130               | H127   | H127     | Q137     |
| R138               | R135   | R135     | R145     |
| <b>Main Chain</b>  |        |          |          |
| V110               | S107   | S107     | V117     |
| <b>Hydrophobic</b> |        |          |          |
| L66                | F62    | F62      | L66      |
| V110               | S107   | S107     | V117     |
| I126               | M123   | L123     | V133     |
| K133 C $\delta$    | K130   | E130     | E140     |
| T137               | D134   | E134     | A144     |

**Supplementary Table 4. Variation in the amino acids that line the interdomain crevice of lipoxygenases.** The corresponding cavities of 12-LOX, 15-LOX-1, and 15-LOX-2 differ at multiple AKBA contact points. Key differences in the binding cavities are highlighted in pink. (The hydrocarbon portions of Lys133 and Thr137 contact the ligand, hence their classification as hydrophobic in the table.)

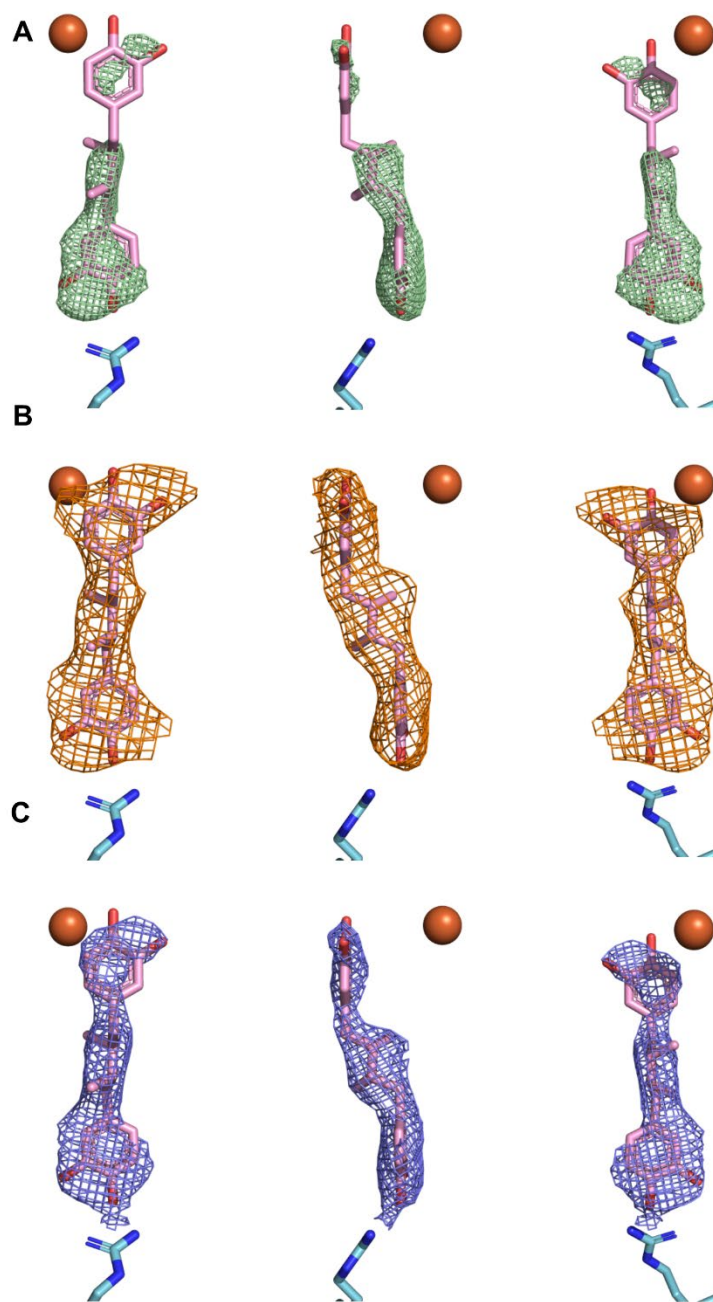

**Supplementary Figure 1. Electron density for NDGA.** (A) Omit map ( $F_o - F_c$ ) of NDGA is shown as green mesh and contoured at  $3.0 \sigma$ . NDGA is represented as sticks (C, pink; O, red) with images rotated by  $90^\circ$ . (B) Polder<sup>1</sup> omit map is shown as orange mesh and contoured at  $3 \sigma$ . (C) Electron density ( $2F_o - F_c$ ) is shown as cyan mesh and is contoured at  $1.0 \sigma$ . All maps are carved to  $1.6 \text{ \AA}$  around NDGA.

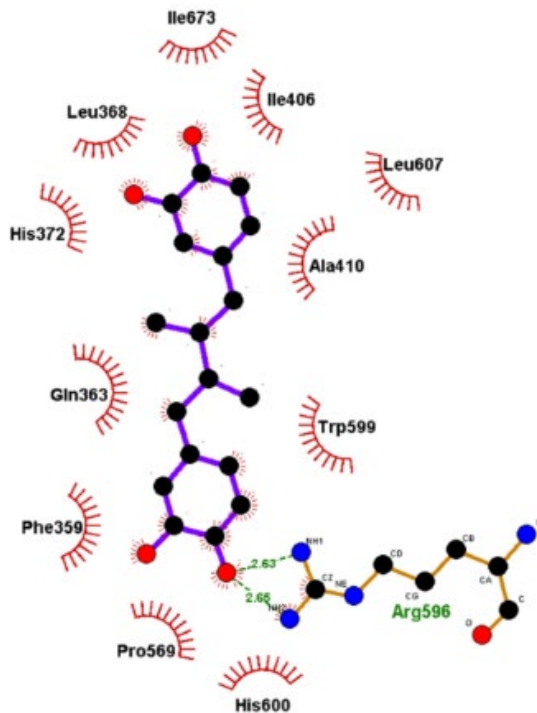

**Supplementary Figure 2. Schematic of the NDGA binding site in Stable-5-LOX.** Drawing generated with LigPlot v.2.1<sup>2</sup>. Amino acids that line the cavity and contribute van der Waal contacts are indicated with spoked arcs. Those amino acids that make polar contacts are rendered as ball and stick. Ligand atoms that make contact with the protein are indicated with red spokes.

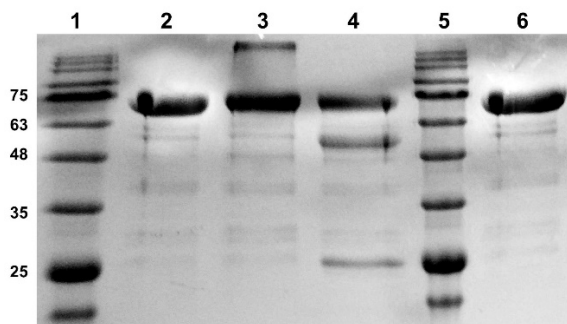

**Supplementary Figure 3. Limited proteolysis of Stable-5-LOX in the presence of small molecules.** SDS gel of limited proteolysis experiments as described in Materials and Methods: Lanes 1 and 5, MW markers, kD; lane 2, DMSO (carrier); lane 3, arachidonic acid (150  $\mu$ M); lane 4, NDGA (150  $\mu$ M), and lane 6, caffeic acid (150  $\mu$ M). Only NDGA dramatically increases the 5-LOX susceptibility to proteolysis by pepsin.

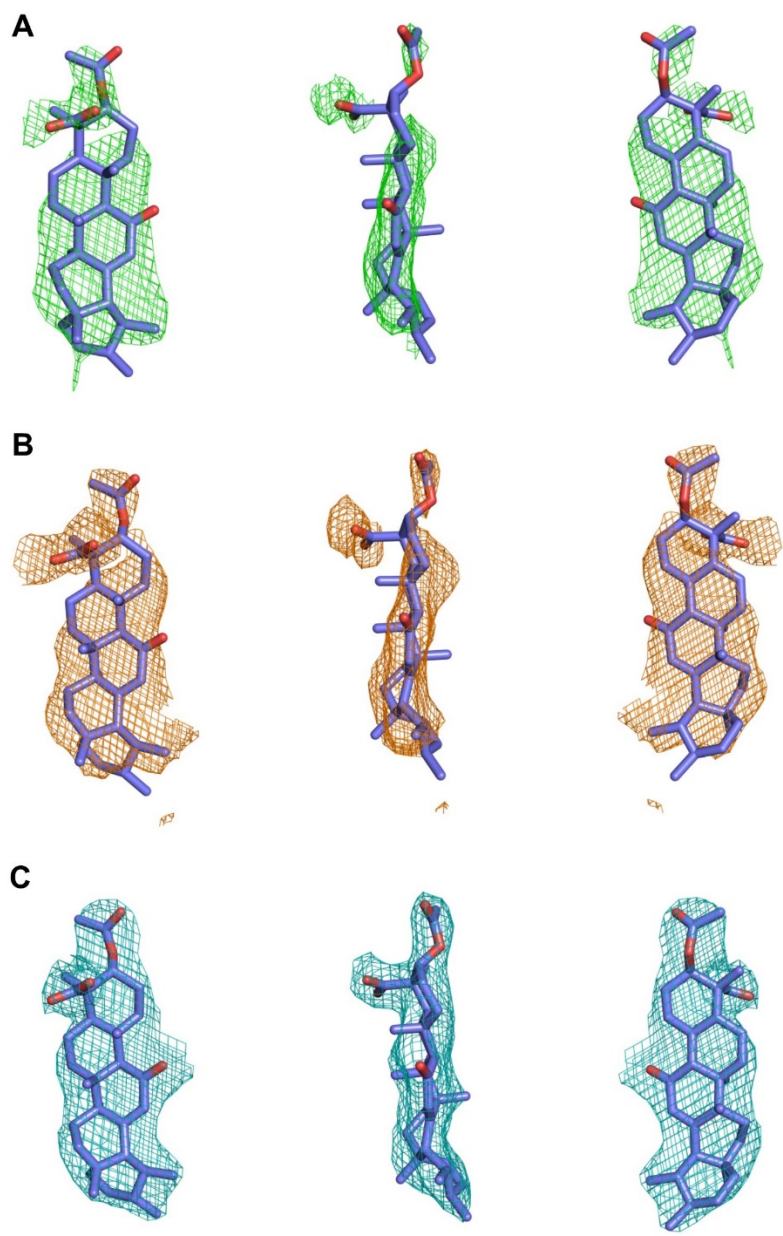

**Supplementary Figure 4. Electron density for AKBA.** (A) Omit map ( $F_o - F_c$ ) of AKBA is shown as green mesh and contoured at  $3 \sigma$ . AKBA is represented as sticks (C, blue; O, red) with images rotated by  $90^\circ$ . (B) Polder<sup>1</sup> omit map is shown as orange mesh and contoured at  $3 \sigma$ . (C) Electron density ( $2F_o - F_c$ ) is shown as cyan mesh and is contoured at  $1.5 \sigma$ . All maps are carved to  $1.6 \text{ \AA}$  of AKBA.

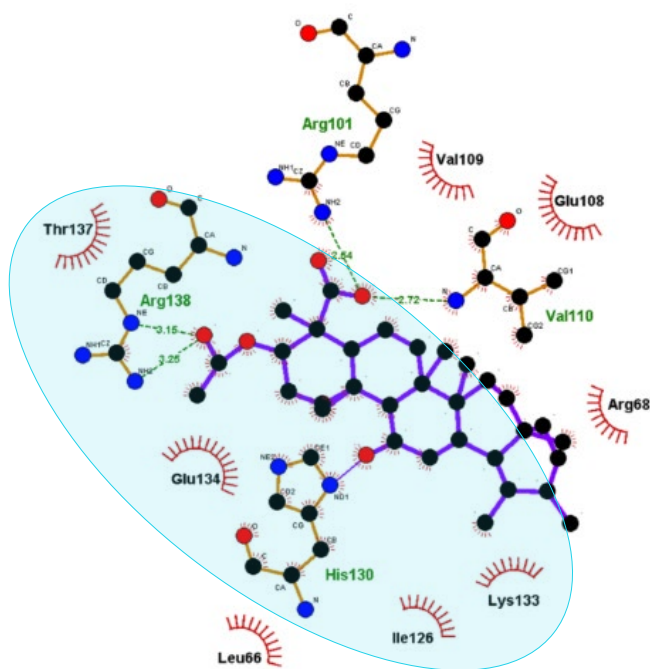

**Supplementary Figure 5. Schematic of the AKBA binding site in Stable-5-LOX.** Drawing generated with LigPlot v.2.1<sup>2</sup>. Amino acids that line the cavity and contribute van der Waal contacts are indicated with spoked arcs. Those amino acids that make polar contacts are rendered as ball and stick. Ligand atoms that make contact with the protein are indicated with red spokes. The oval encircles the amino acids of the catalytic domain that contribute to binding to AKBA.

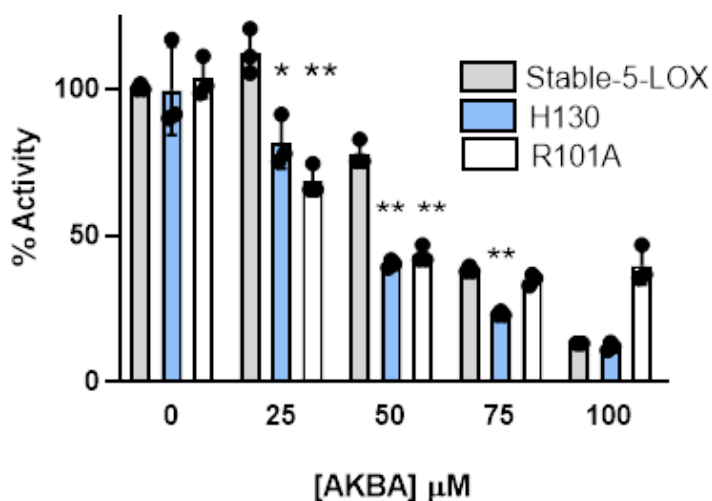

**Supplementary Figure 6. Mutations to the AKBA binding site in Stable-5-LOX result in changes in AKBA sensitivity.** Stable-5-LOX and the H1301A and R101A mutants were assayed in triplicate in the presence of AKBA at the indicated concentrations, as described in Material and Methods. Both mutations render the enzyme more sensitive to the presence of AKBA than wild-type Stable-5-LOX. Students paired t-test vs. Stable-5-LOX: \*  $p < 0.0001$ , \*\*  $p < 0.00001$ .



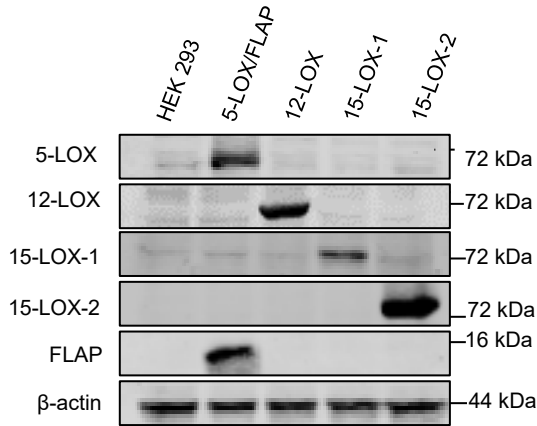

**Supplementary Figure 7. Western blot analysis of LOXs and FLAP in HEK293 cells.** Cell lysates of HEK293 cells corresponding to  $2 \times 10^6$  cells were separated on 10% polyacrylamide gels for 5-LOX, 12-LOX, 15-LOX-1 and 15-LOX-2 or on a 16% polyacrylamide gels for FLAP, and blotted onto nitrocellulose membranes (Amersham™ Protran Supported 0.45  $\mu$ m nitrocellulose, GE Healthcare, Freiburg, Germany). Uncropped blots are presented in **Supplementary Figure 10**.

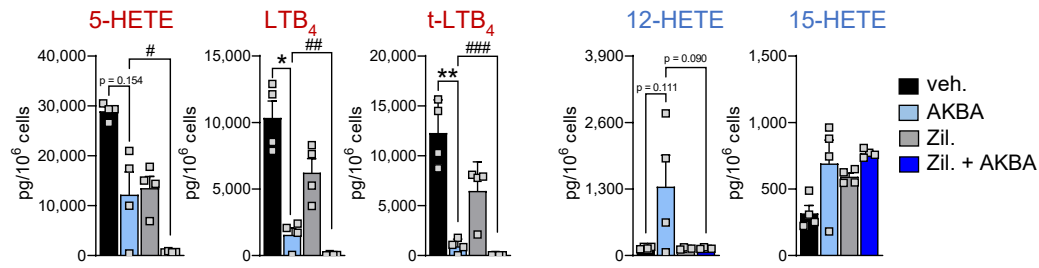

**Supplementary Figure 8. Zileuton abolishes AKBA-induced 12-HETE formation in 5-LOX/FLAP-expressing HEK293 cells.**  $1 \times 10^6$  HEK293 cells expressing 5-LOX and FLAP were pretreated with 25  $\mu$ M AKBA, 3  $\mu$ M zileuton (zil.) or vehicle (0.1% DMSO) for 10 min before stimulation with 2.5  $\mu$ M A23187 plus 1  $\mu$ M AA for another 10 min. Formed LM were analysed by UPLC-MS-MS, shown in pg/10<sup>6</sup> cells of  $n = 4$  independent experiments. Data were log-transformed for statistical analysis, \* $p < 0.05$ , \*\* $p < 0.01$  AKBA vs. veh. control; # $p < 0.05$ , ## $p < 0.01$ , ### $p < 0.001$  Zil. + AKBA vs. AKBA ANOVA + Dunnett's multiple comparisons test.

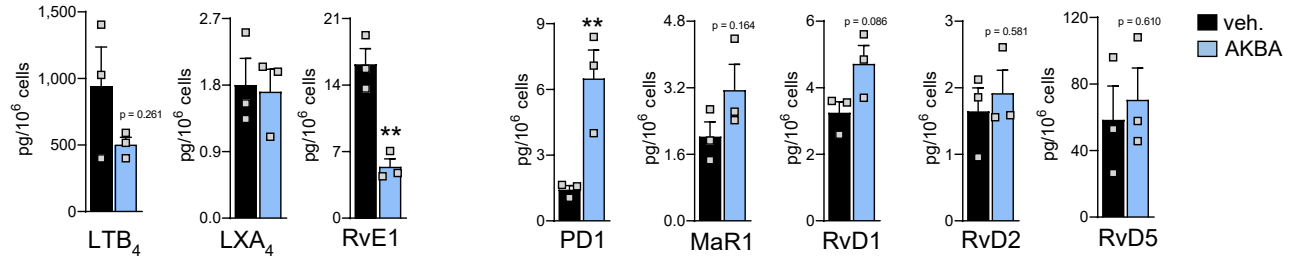

**Supplementary Figure 9. Effects of AKBA on SPM formation in 5-LOX/FLAP-expressing HEK293 cells.**  $1 \times 10^6$  HEK293 cells expressing 5-LOX and FLAP were incubated with 25  $\mu$ M AKBA or vehicle plus 1  $\mu$ M AA, 1  $\mu$ M EPA and 1  $\mu$ M DHA for 90 min before stimulation with 2.5  $\mu$ M A23187 for another 10 min. Formed LM were isolated by SPE and analysed by UPLC-MS-MS. Data are shown as pg/10<sup>6</sup> cells of  $n = 3$  independent experiments. Data were log-transformed for statistical analysis, \*\* $p < 0.01$  AKBA vs. vehicle, Student's paired t-test.

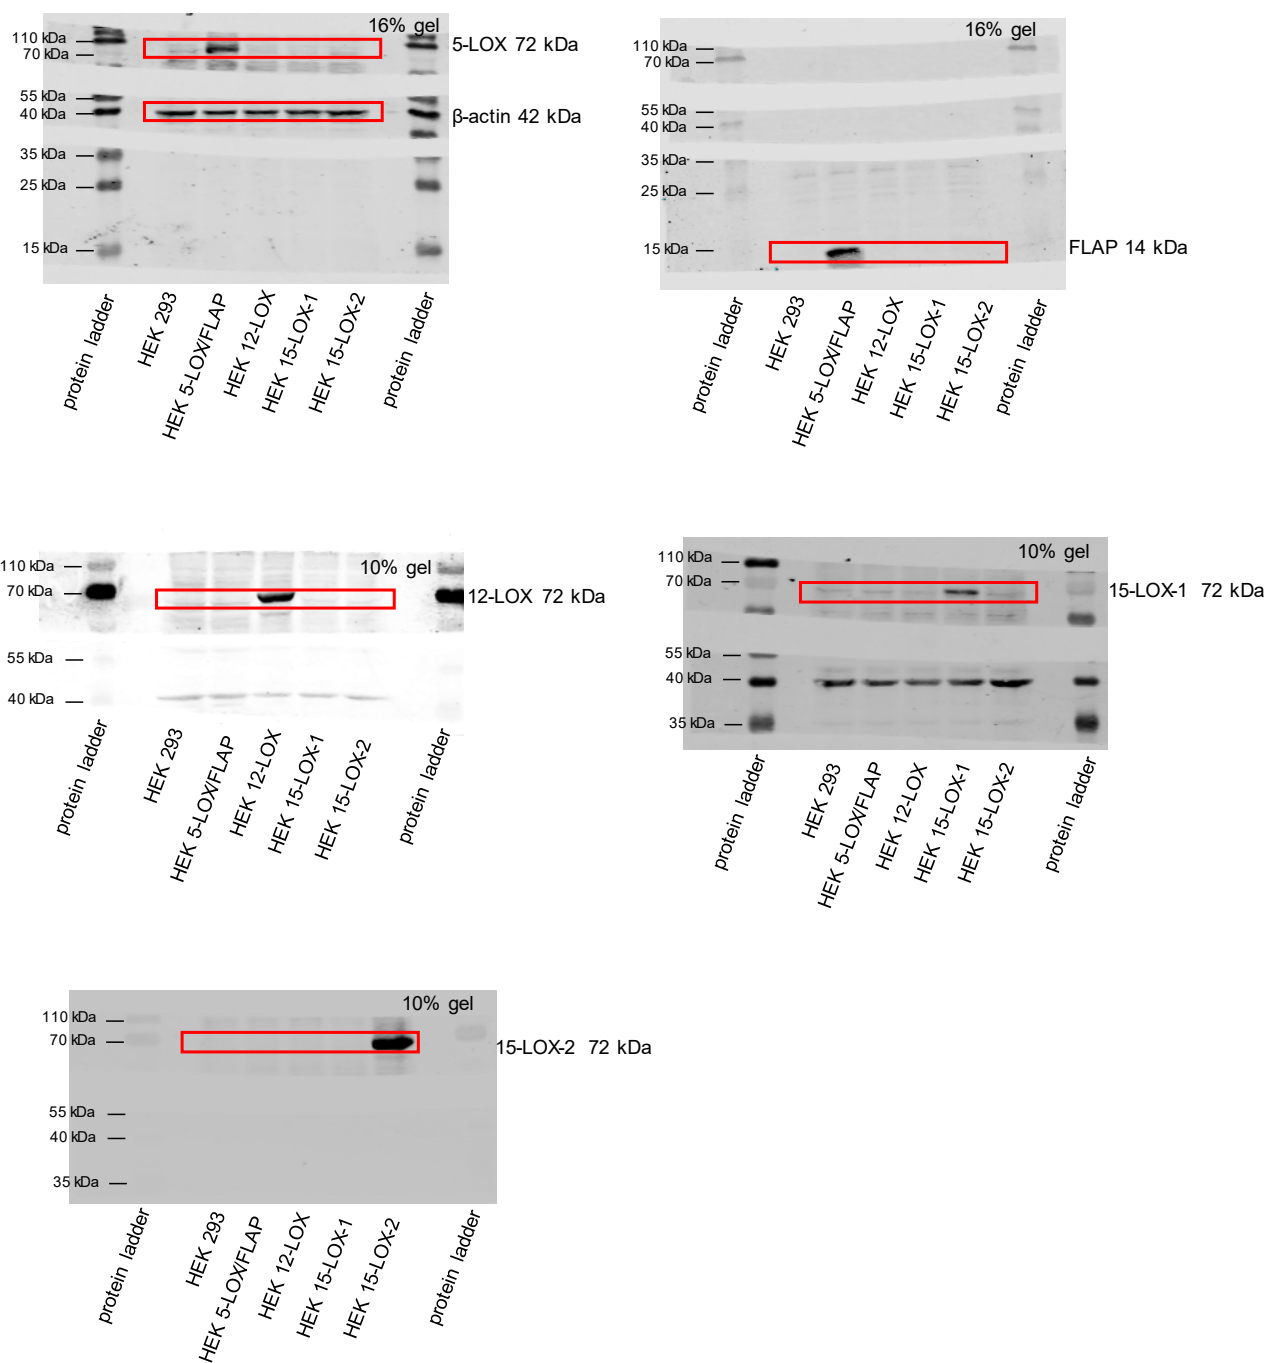

**Supplementary Figure 10. Uncropped blots and gels shown in Supplementary Figure 7.**

### References

1. Liebschner, D. *et al.* Polder maps: improving OMIT maps by excluding bulk solvent. *Acta crystallographica. Section D, Structural biology* **73**, 148-157, doi:10.1107/S2059798316018210 (2017).
2. Laskowski, R. A. & Swindells, M. B. LigPlot+: multiple ligand-protein interaction diagrams for drug discovery. *J Chem Inf Model* **51**, 2778-2786, doi:10.1021/ci200227u (2011).
